# Supplementary material for: Restricted rotation and tunable fluorescence in atropisomeric naphthyl pyridine chromophores
Source: Royal Society of Chemistry journal article supplement (doi:10.1039/d3ob01819a), 2023-01-01
Supplement: d3ob01819a1.pdf [file d3ob01819a1.pdf]

Electronic Supplementary Information

**Restricted rotation and tunable fluorescence in atropisomeric naphthyl pyridine  
chromophores**

Olga Yunyaeva,<sup>a</sup> Duane Hean,<sup>a</sup> Michael O. Wolf<sup>a\*</sup>

<sup>a</sup>Department of Chemistry, University of British Columbia, 2036 Main Mall, Vancouver, British  
Columbia, Canada V6T 1Z1

**Table of Contents**

|                            |    |
|----------------------------|----|
| Synthetic Schemes .....    | 2  |
| Additional Figures .....   | 4  |
| NMR Spectroscopy .....     | 9  |
| Crystallography Data ..... | 23 |

## Synthetic Schemes

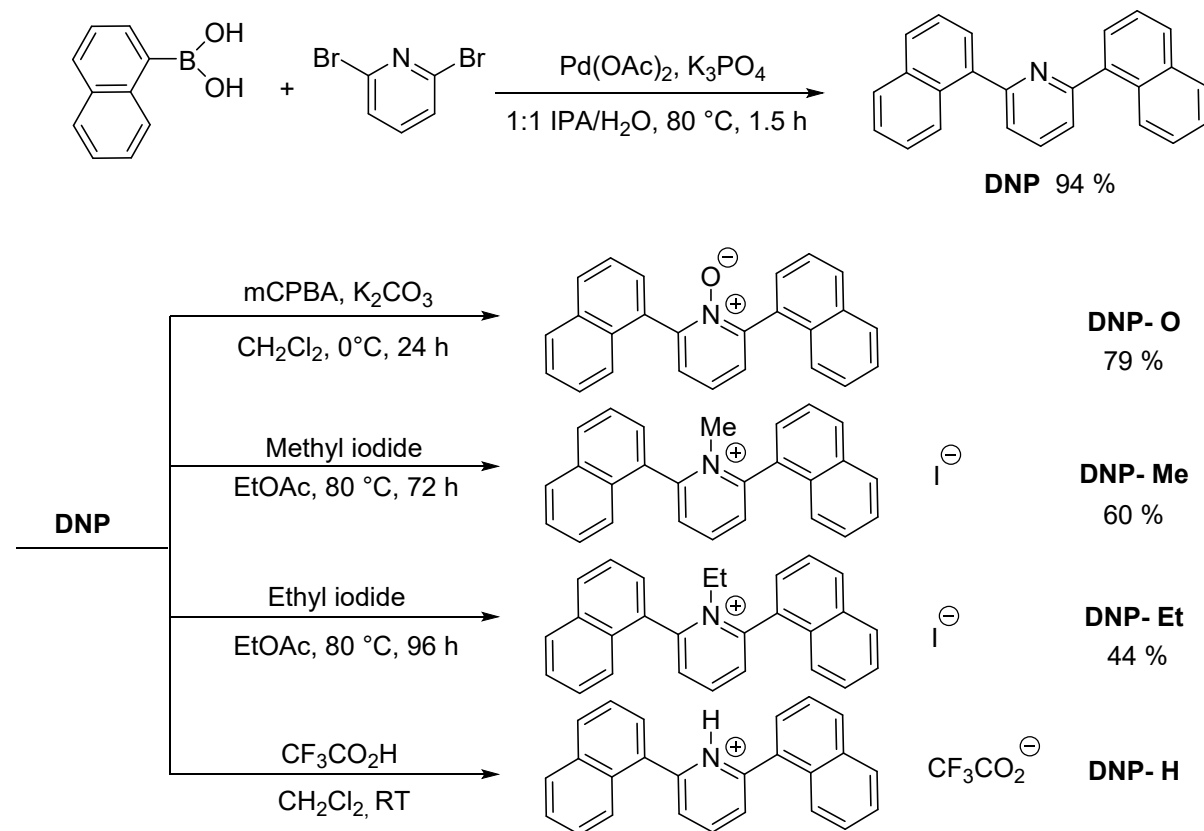

**Figure S1.** Synthetic route to disubstituted parent compound DNP and N-functionalized derivatives.

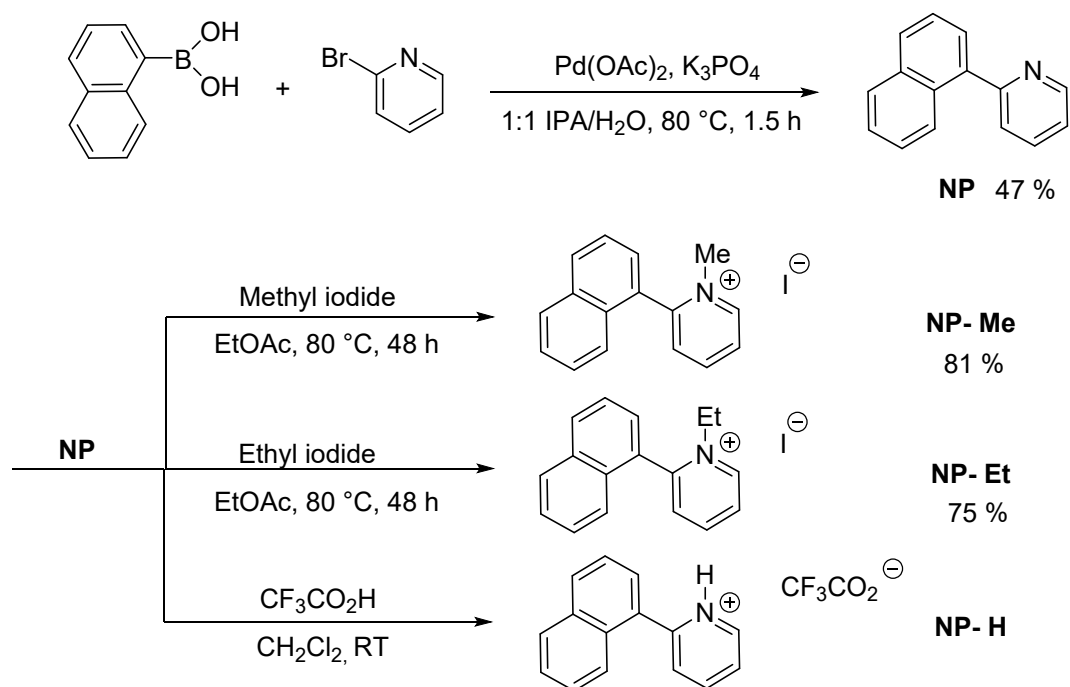

**Figure S2.** Synthetic route to monosubstituted parent compound NP and N-functionalized derivatives.

## Additional Figures

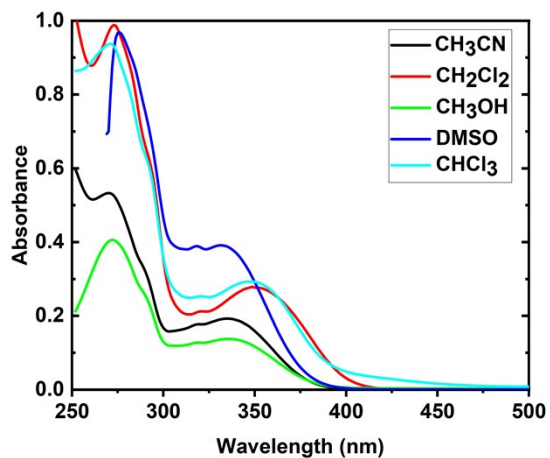

**Figure S3.** Absorption spectrum of **DNP-Me** in a range of solvents.

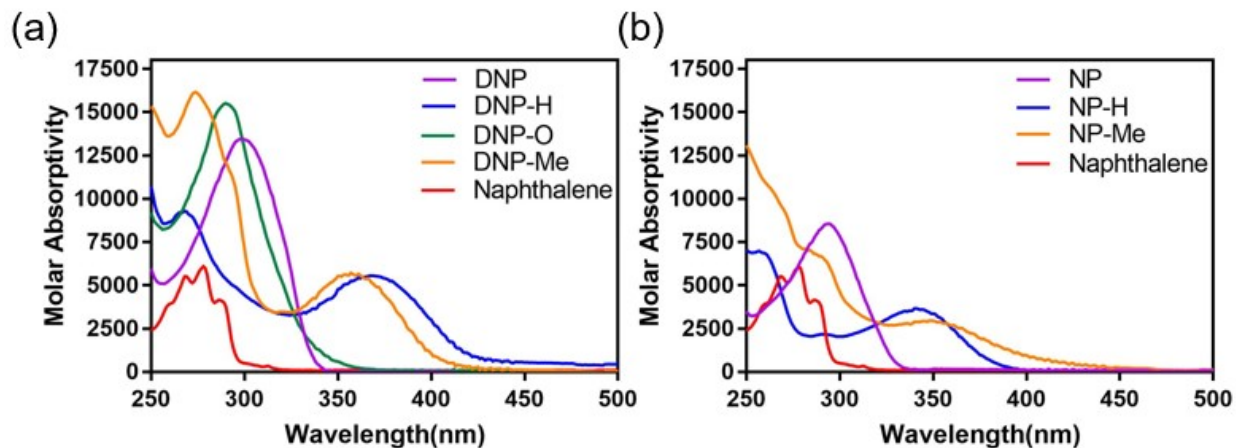

**Figure S4.** Molar absorptivity of (a) **DNP** and (b) **NP** compounds compared with naphthalene in  $\text{CH}_2\text{Cl}_2$ .

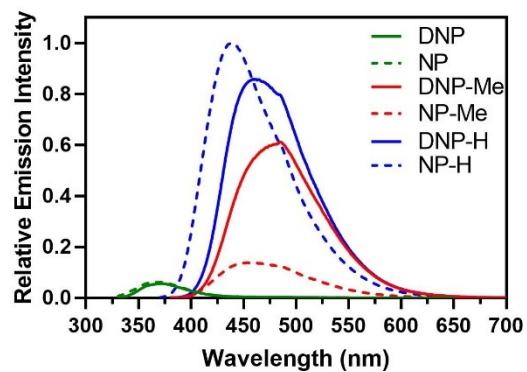

**Figure S5.** Relative emission spectra of **DNP** (solid line) and **NP** (dashed line) compounds taken in  $\text{CH}_2\text{Cl}_2$  collected at an absorbance of 0.1, excited at  $\lambda_{\text{max}}$ .

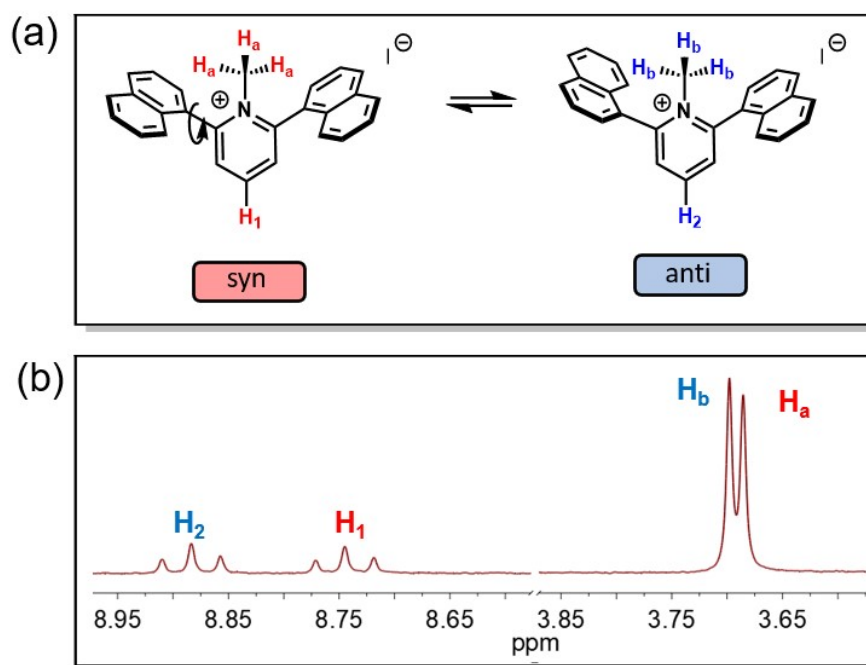

**Figure S6.** (a) Proposed conformations of two **DNP-Me** atropisomers (b) Portions of the  $^1\text{H}$  NMR spectrum of **DNP-Me** in  $\text{CD}_2\text{Cl}_2$  (400 MHz) at 25 °C.

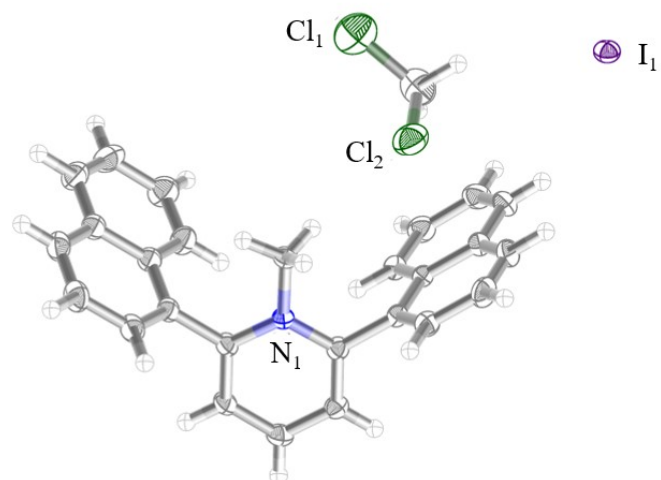

**Figure S7.** Crystal structure of **Me-DNP** with I<sup>-</sup> as the counterion solvated with CH<sub>2</sub>Cl<sub>2</sub>.

Ellipsoids are plotted at the 50% probability level.

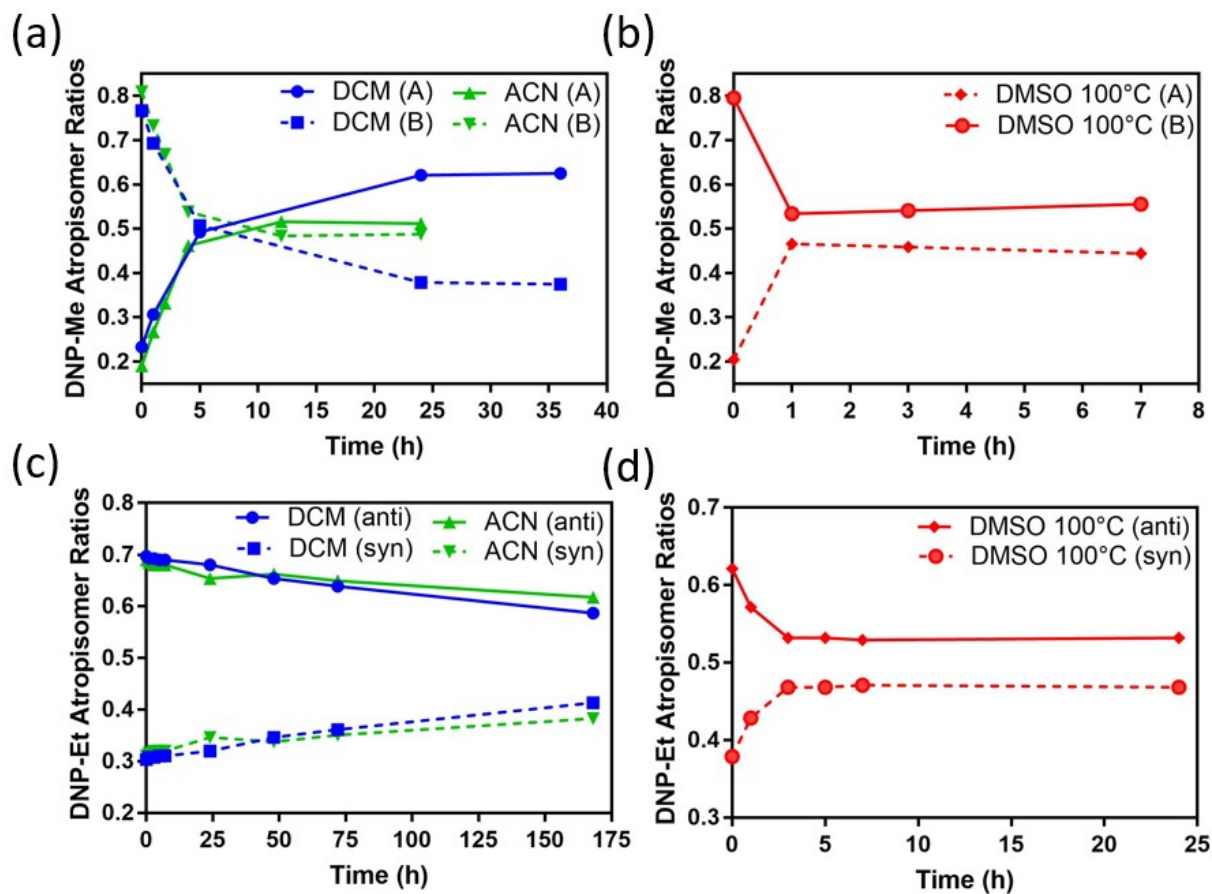

**Figure S8.** (a) Atropisomer ratios of **DNP-Me** over time in ambient light in  $\text{CH}_2\text{Cl}_2$  and  $\text{CH}_3\text{CN}$  (b) and in DMSO at  $100^\circ\text{C}$ . (c) Atropisomer ratios of **DNP-Et** over time in ambient light in  $\text{CH}_2\text{Cl}_2$  and  $\text{CH}_3\text{CN}$  (d) and in DMSO at  $100^\circ\text{C}$ .

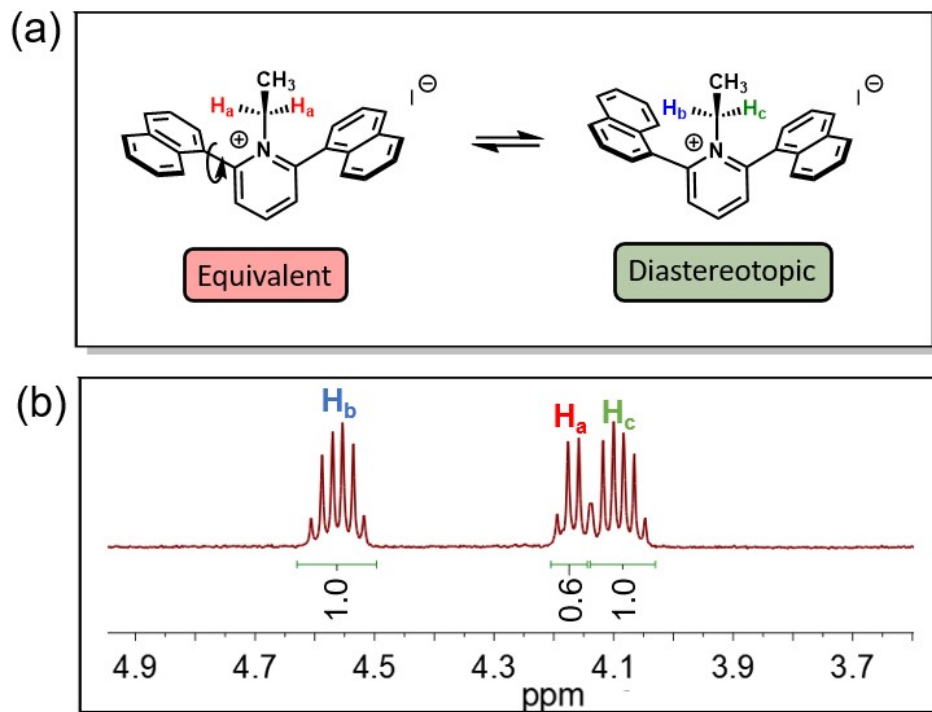

**Figure S9.** (a) Two atropisomers of **DNP-Et** and their conformations that lead to equivalent and diastereotopic peaks of the methylene protons in  $^1\text{H}$  NMR. (b) Close up of the three methylene peaks present in the  $^1\text{H}$  NMR spectrum of **DNP-Et** in  $\text{CD}_2\text{Cl}_2$  (400 MHz at 25 °C) from  $\delta$  4.05-4.70, integrations relative to  $\text{H}_b$  and  $\text{H}_c$ , doublet of quartets.



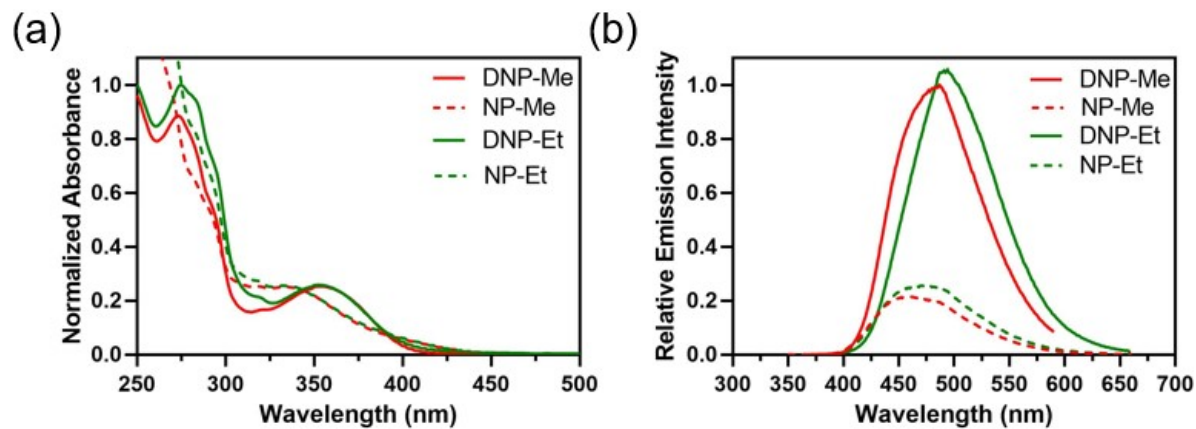

**Figure S10.** Relative (a) absorbance and (b) emission of **DNP-Me** and **DNP-Et** (solid line) and **NP** (dashed line) compounds in  $\text{CH}_2\text{Cl}_2$  at  $1 \times 10^{-5}$  M collected at an absorbance of 0.1, excited at  $\lambda_{\text{max}}$ .

### NMR Spectroscopy

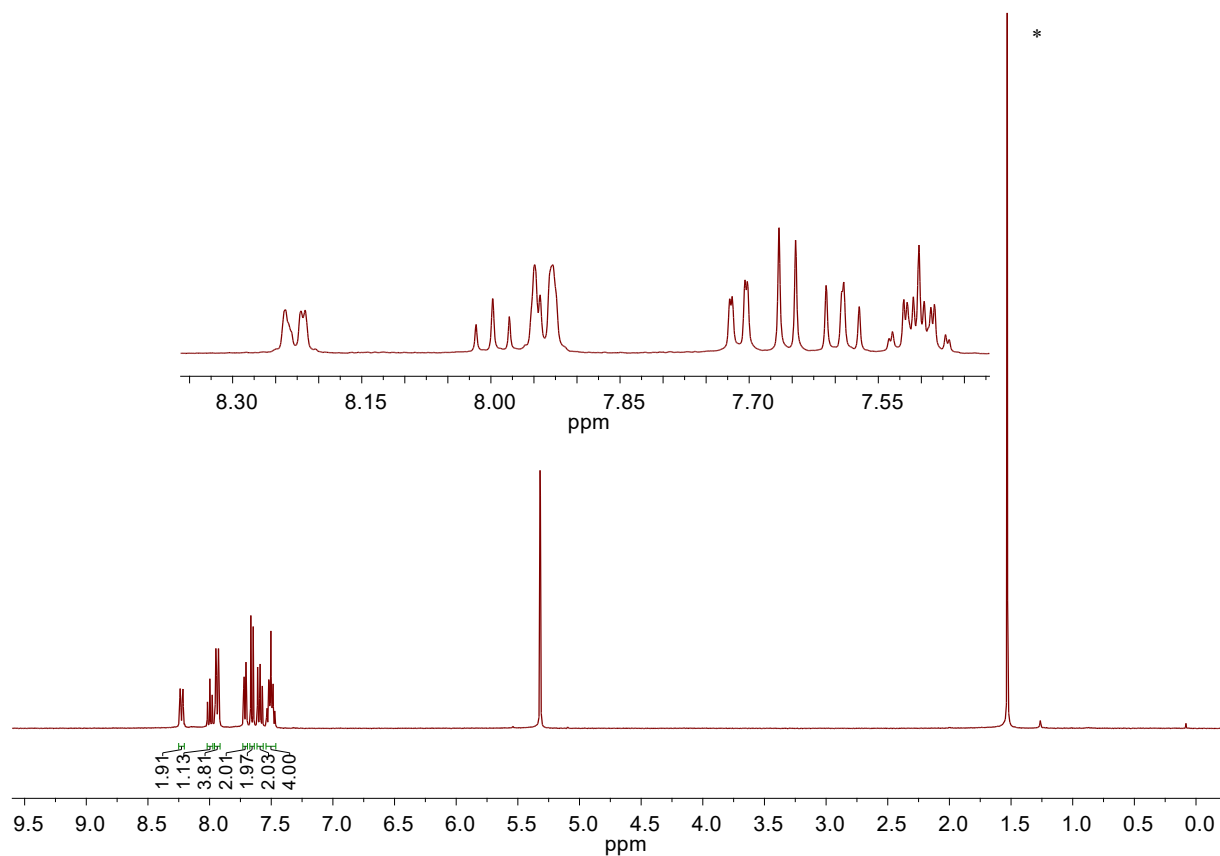

**Figure S11.**  $^1\text{H}$  NMR spectrum of **DNP** (300 MHz,  $\text{CD}_2\text{Cl}_2$ ) at  $25^\circ\text{C}$ . \* = water.

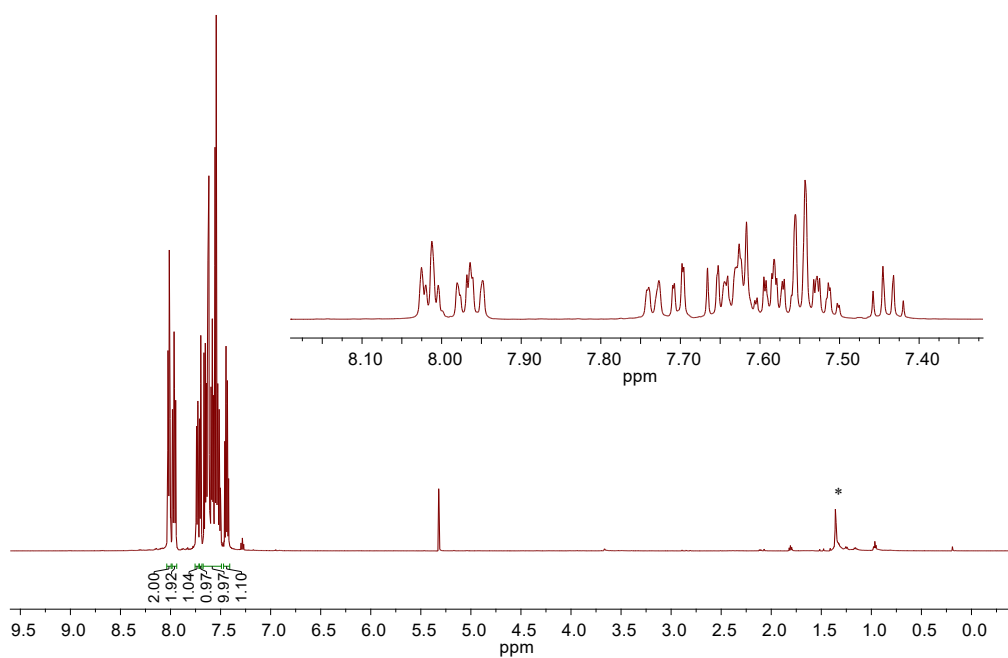

**Figure S12.** <sup>1</sup>H NMR spectrum of **DNP-O** (600 MHz, CD<sub>2</sub>Cl<sub>2</sub>) at 25°C, \* = H grease

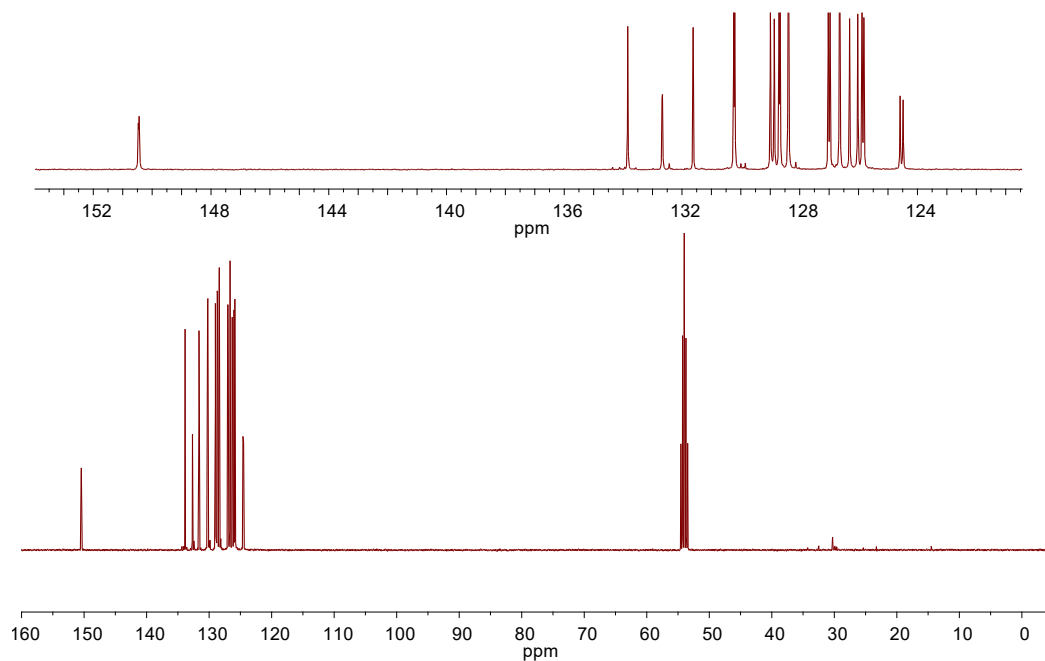

**Figure S13.** <sup>13</sup>C NMR spectrum of **DNP-O** (101 MHz, CD<sub>2</sub>Cl<sub>2</sub>) at 25°C, peak doubling can be observed.

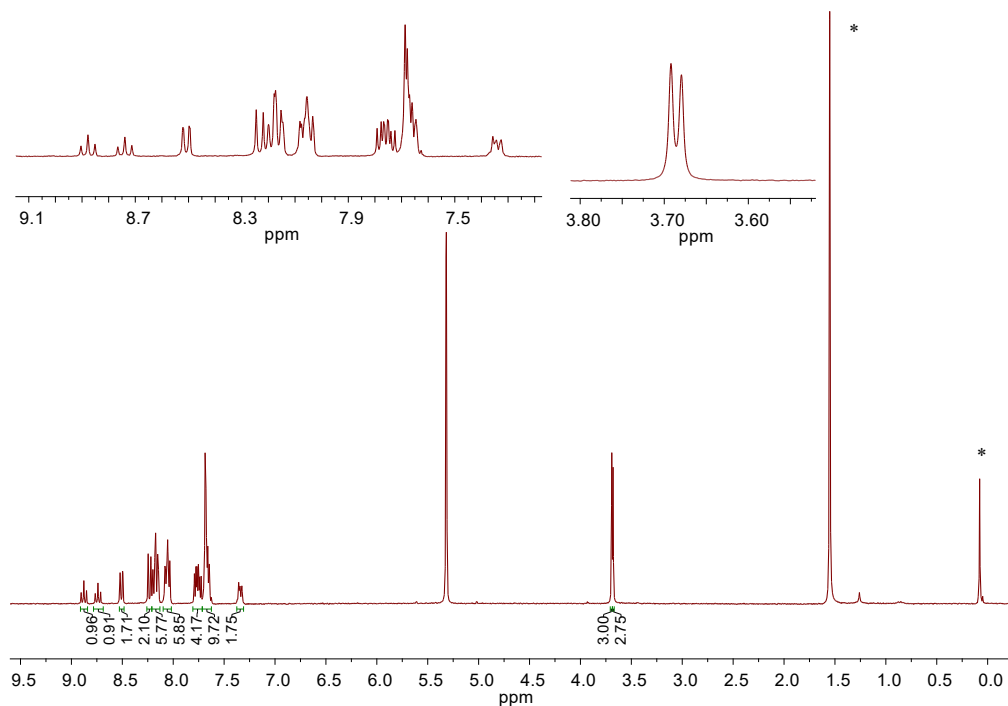

**Figure S14.**  $^1\text{H}$  NMR spectrum of **DNP-Me** (300 MHz,  $\text{CD}_2\text{Cl}_2$ ) at  $25^\circ\text{C}$ , doubling of the peaks can be seen.

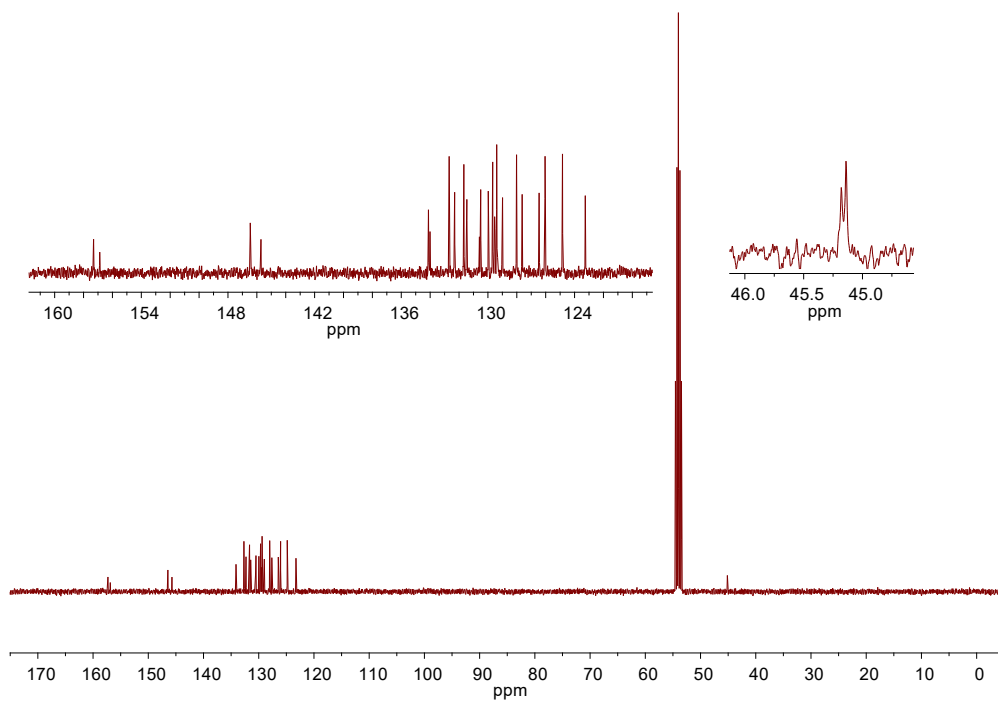

**Figure S15.**  $^{13}\text{C}$  NMR spectrum of **DNP-Me** (101 MHz,  $\text{CD}_2\text{Cl}_2$ ) at  $25^\circ\text{C}$ , doubling of the peaks can be seen.

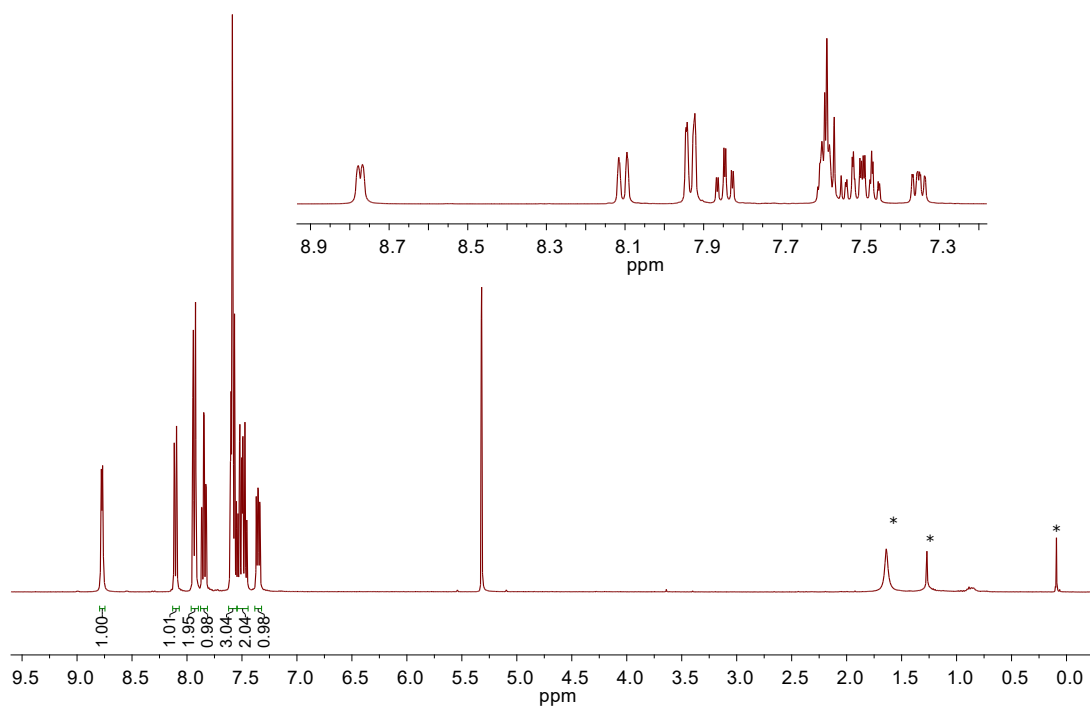

**Figure S16.**  $^1\text{H}$  NMR spectrum of NP (300 MHz,  $\text{CD}_2\text{Cl}_2$ ) at  $25^\circ\text{C}$ . \* = water, hexanes, H grease.

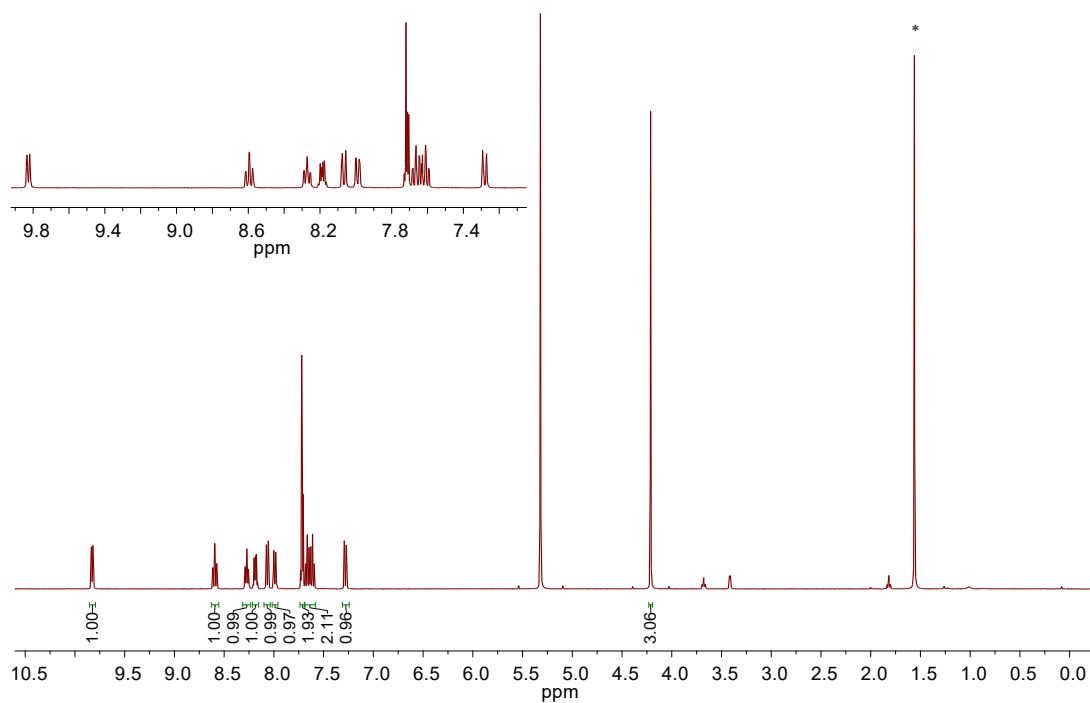

**Figure S17.**  $^1\text{H}$  NMR spectrum of NP-Me (400 MHz,  $\text{CD}_2\text{Cl}_2$ ) at  $25^\circ\text{C}$ . \* = water.

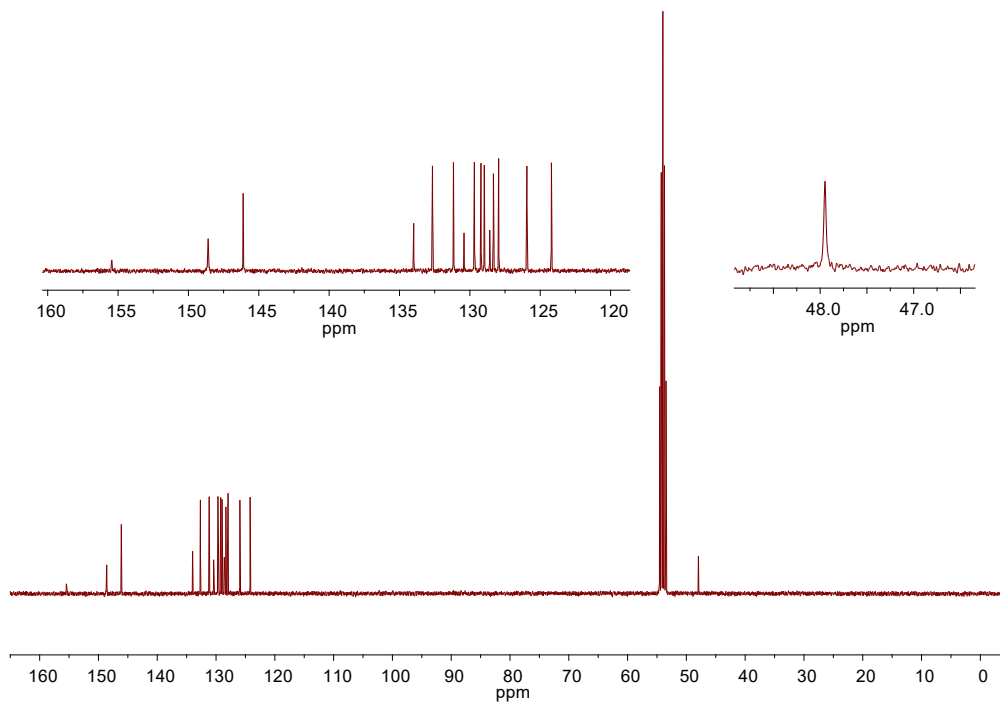

**Figure S18.**  $^{13}\text{C}$  NMR spectrum of NP-Me (101 MHz,  $\text{CD}_2\text{Cl}_2$ ) at  $25^\circ\text{C}$ .

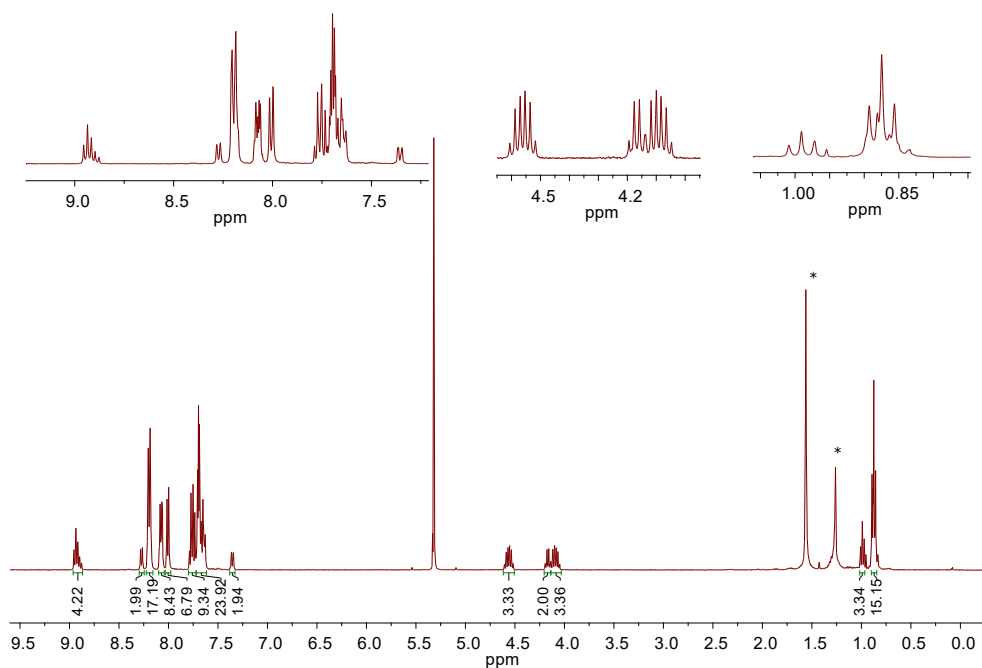

**Figure S19.**  $^1\text{H}$  NMR spectrum of DNP-Et (400 MHz,  $\text{CD}_2\text{Cl}_2$ ) at  $25^\circ\text{C}$ , doubling of the peaks can be seen, atropisomers are not in a 1:1 ratio, therefore integration does not accurately represent number of protons.

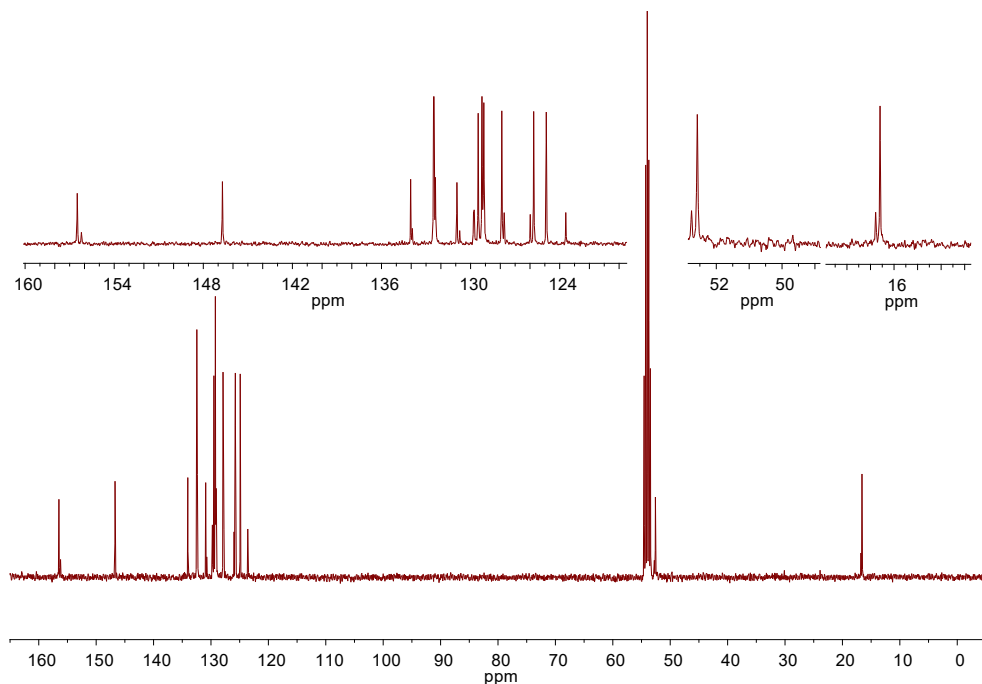

**Figure S20.**  $^{13}\text{C}$  NMR spectrum of **DNP-Et** (101 MHz,  $\text{CD}_2\text{Cl}_2$ ) at  $25^\circ\text{C}$ , doubling of the peaks can be seen.

\* = water, H grease.

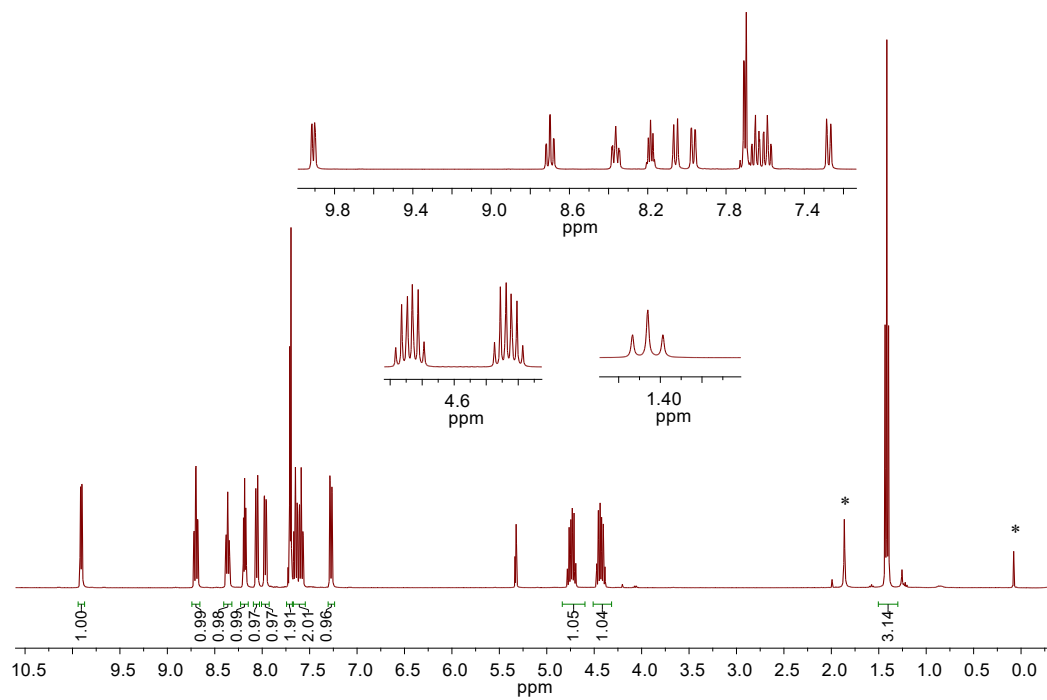

**Figure S21.**  $^1\text{H}$  NMR spectrum of NP-Et (400 MHz,  $\text{CD}_2\text{Cl}_2$ ) at  $25^\circ\text{C}$ .

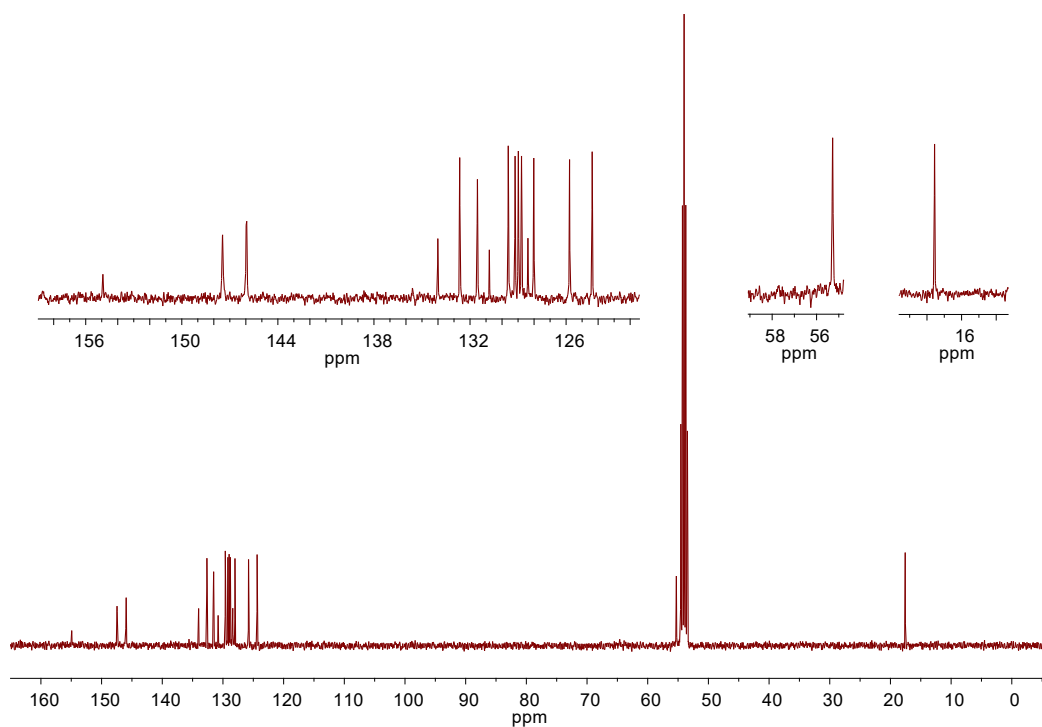

**Figure S22.**  $^{13}\text{C}$  NMR spectrum of NP-Et (101 MHz,  $\text{CD}_2\text{Cl}_2$ ) at  $25^\circ\text{C}$ .

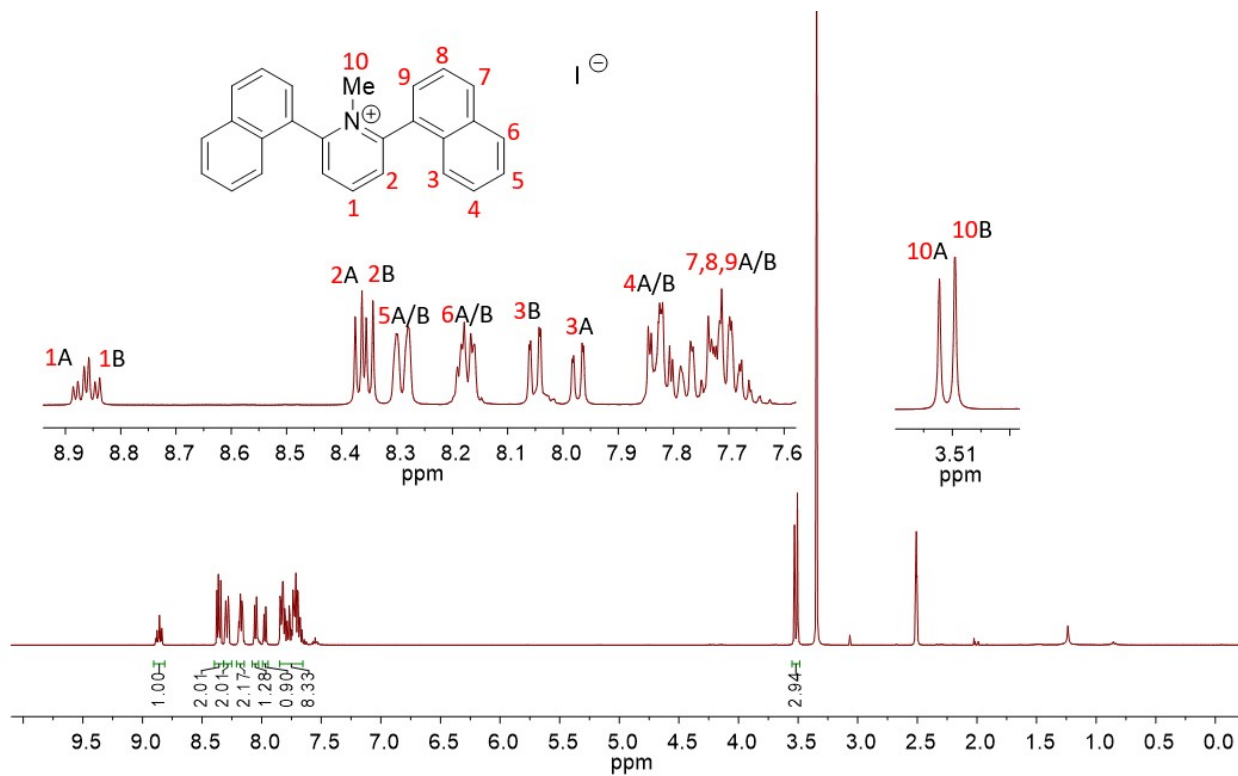

**Figure S23.** <sup>1</sup>H NMR spectrum of DNP-Me (400 MHz, DMSO-d<sub>6</sub>) at 25°C. Atropisomer A/B is assigned.



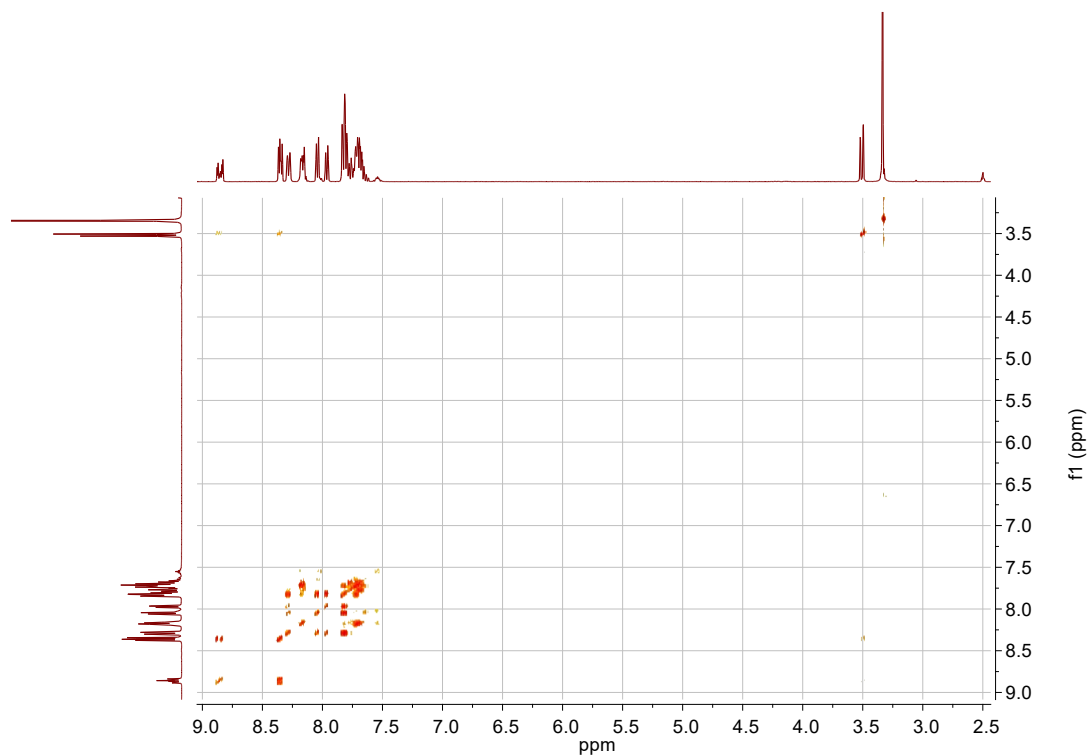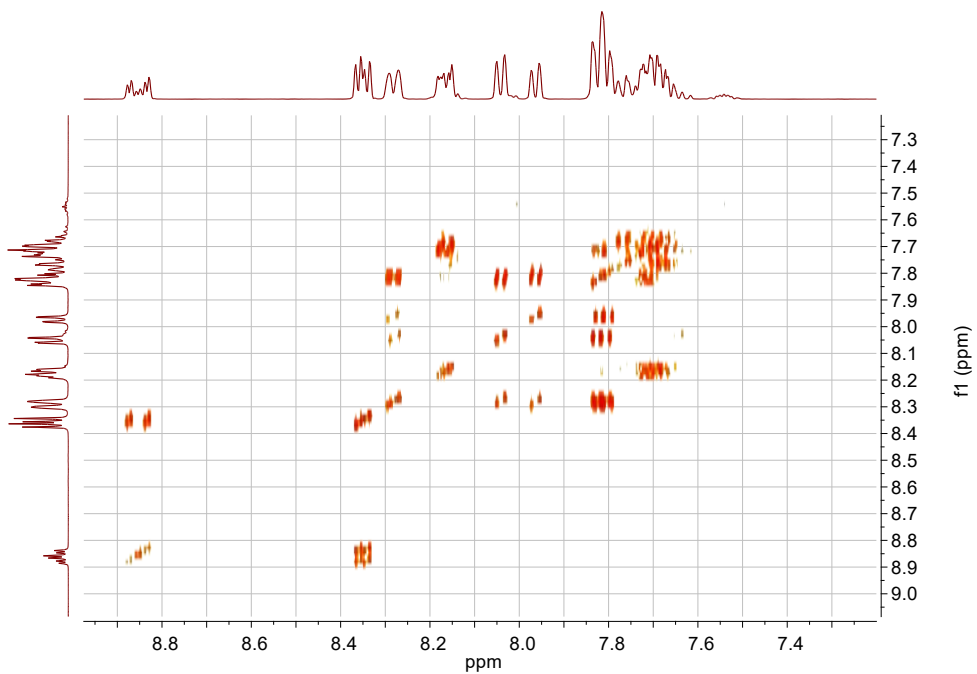

**Figure S24.** COSY spectrum of **DNP-Me** in  $\text{DMSO-d}_6$  at  $25^\circ\text{C}$ .

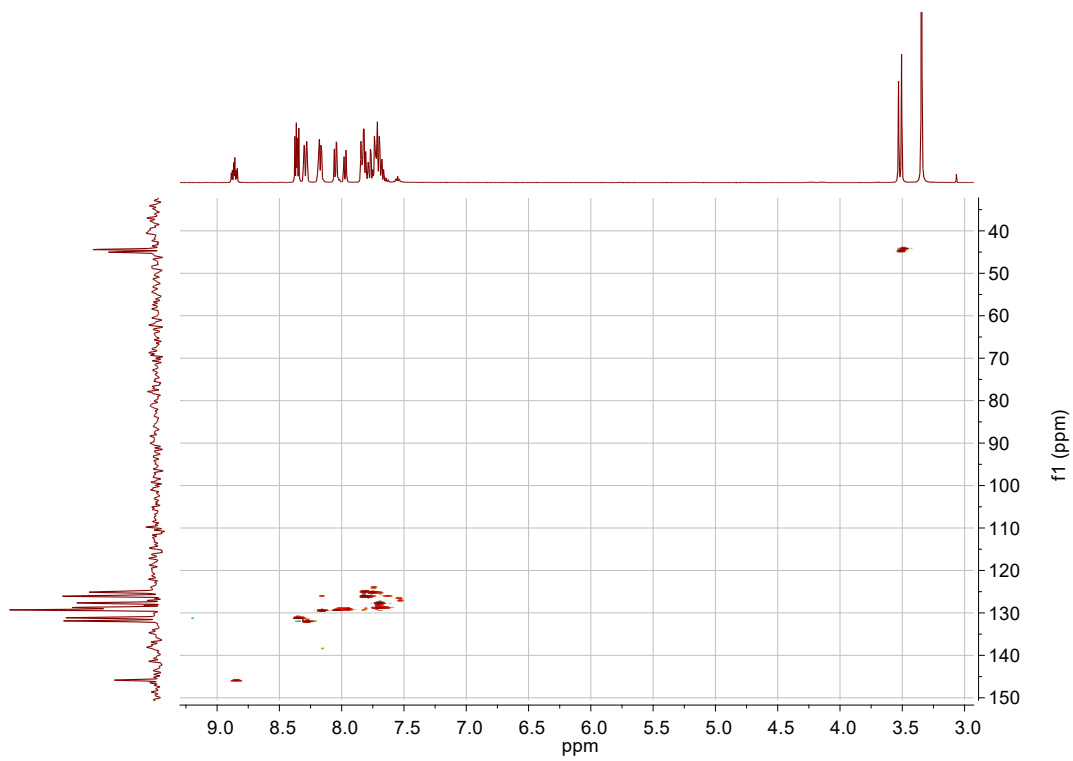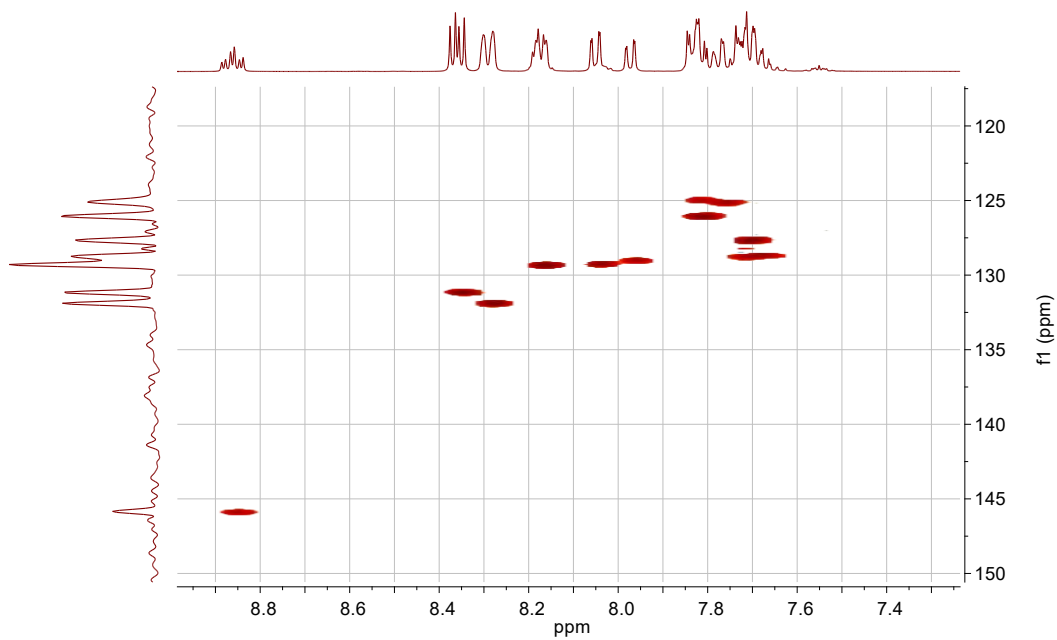

**Figure S25.** HSQC spectrum of **DNP-Me** in DMSO-d<sub>6</sub> at 25°C.

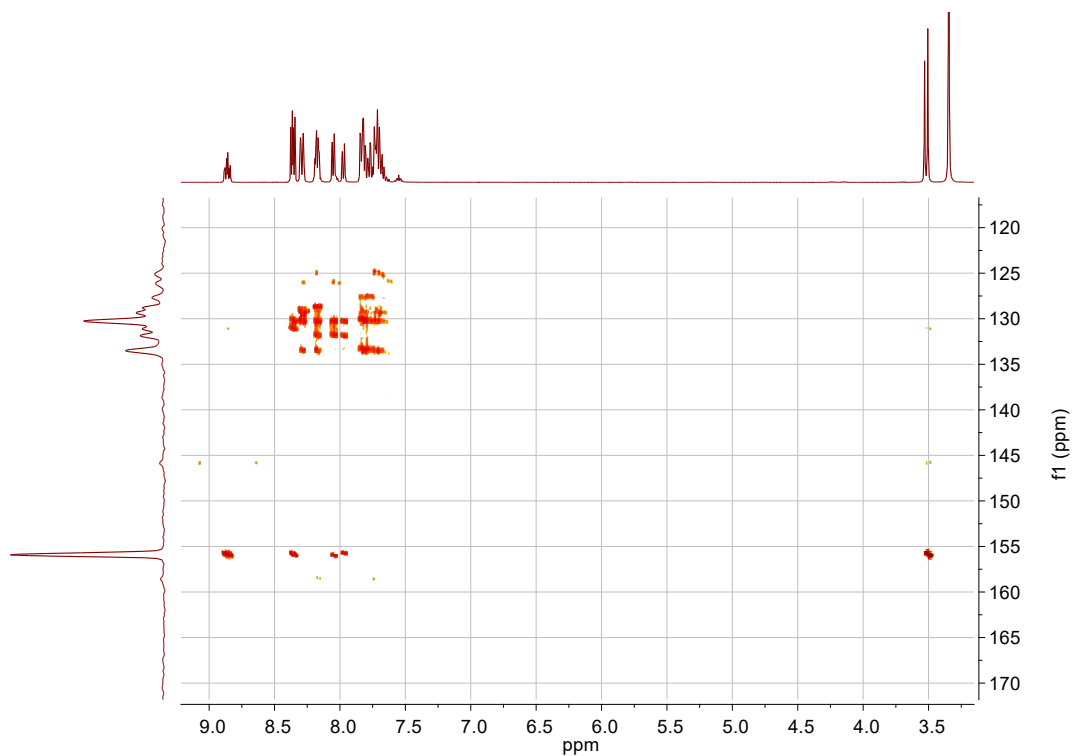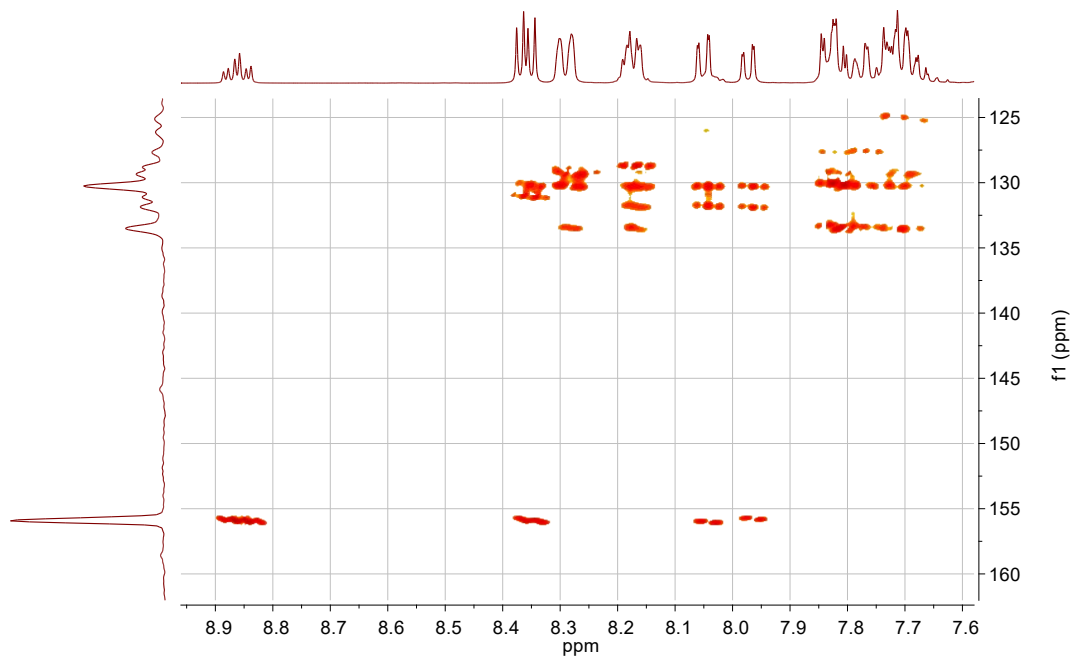

**Figure S26.** HMBC spectrum of **DNP-Me** in  $\text{DMSO-d}_6$  at  $25^\circ\text{C}$ .

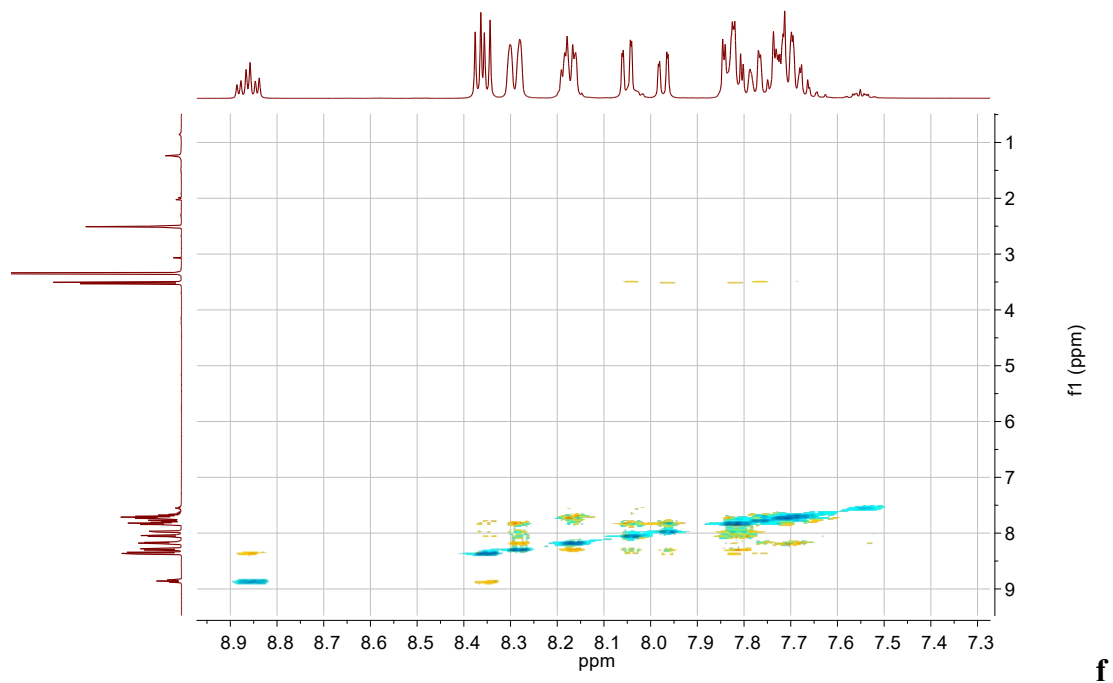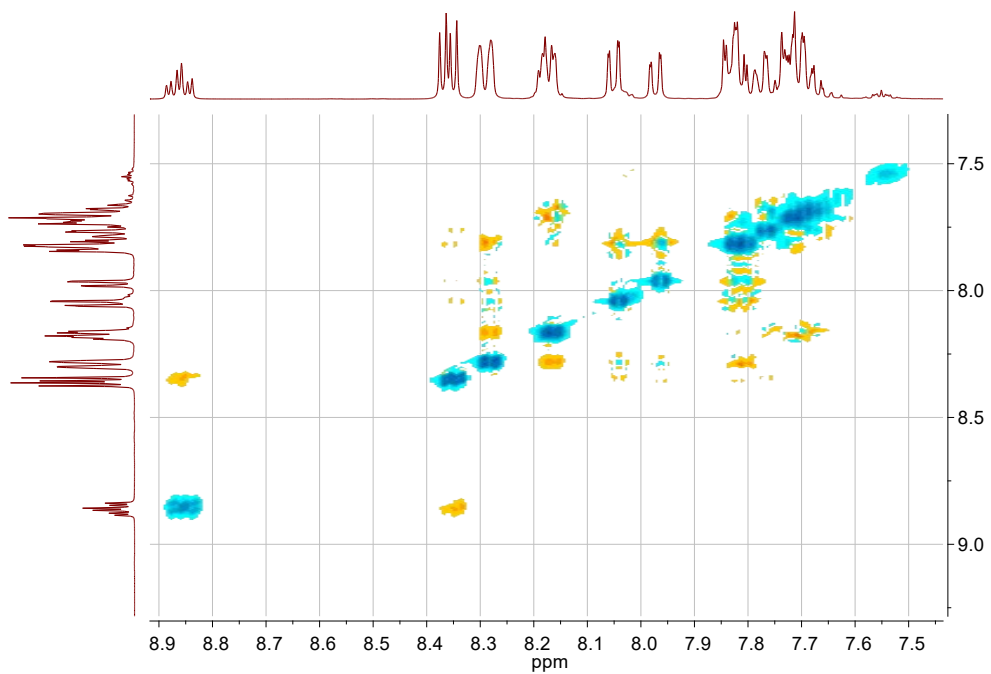

**Figure S27.** NOESY spectrum of **DNP-Me** in DMSO-d<sub>6</sub> at 25°C.

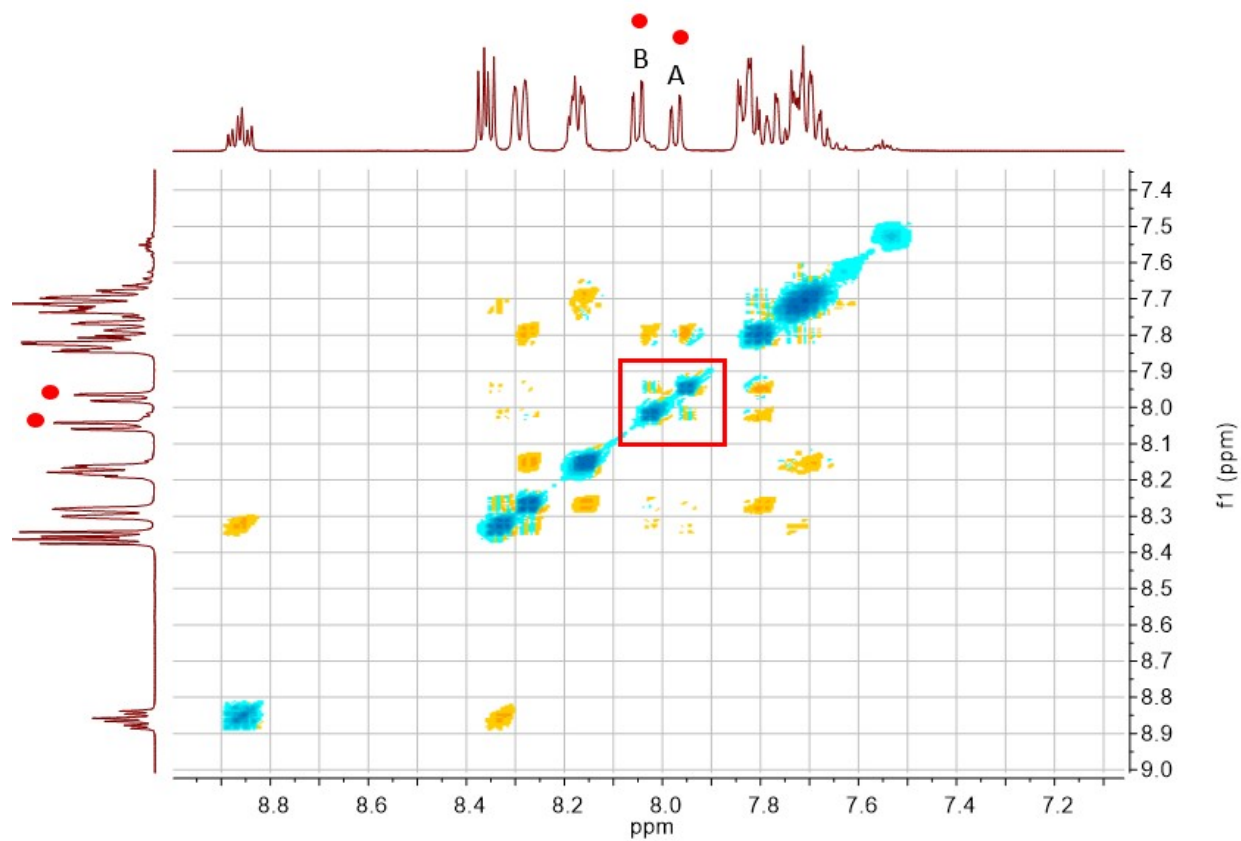

**Figure S28.** 2D NOESY spectra of **DNP-Me** in DMSO-d<sub>6</sub> at 75°C. Atropisomers A and B are distinguishable at  $\delta = 8.05, 7.97$ . A cross peak is present at elevated temperatures indicating chemical exchange is occurring between A and B.

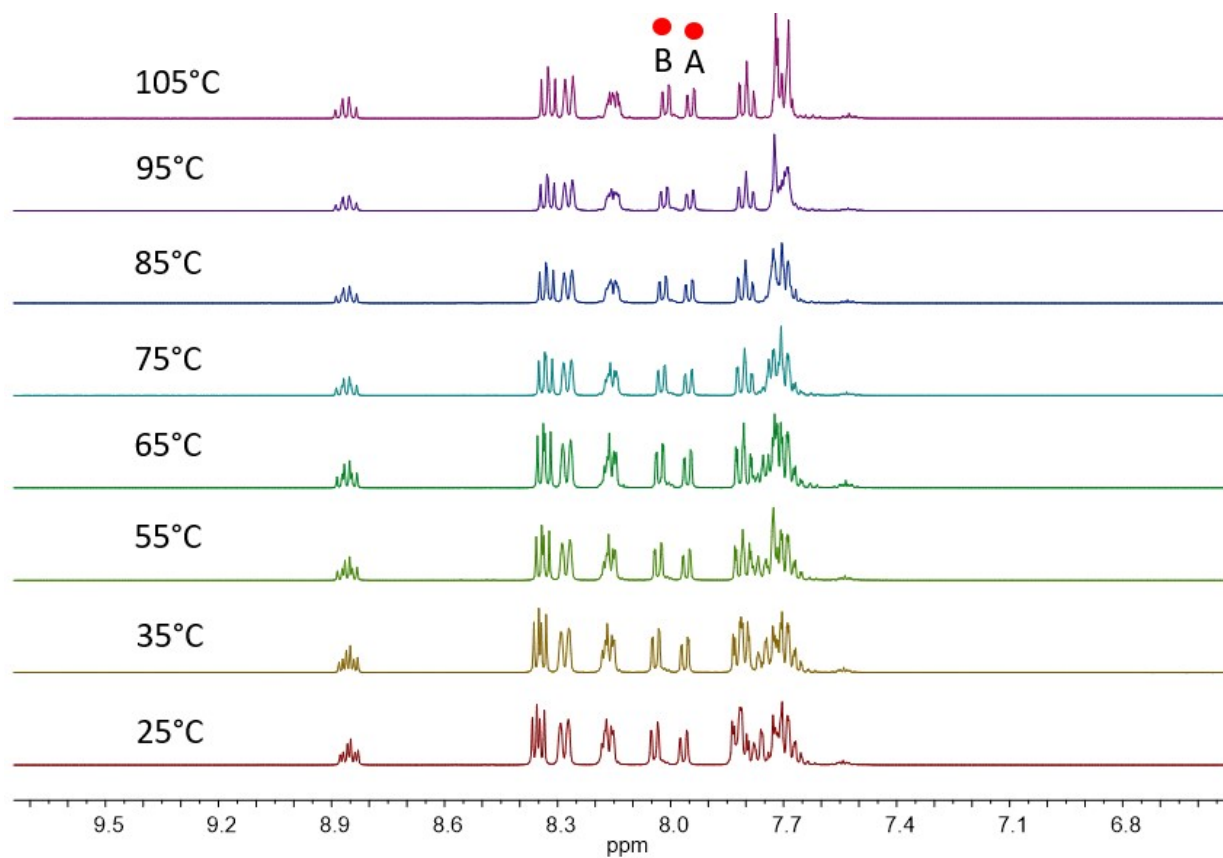

**Figure S29.** VT NMR of **DNP-Me** (400 MHz, DMSO-d<sub>6</sub>) from 25-105 °C. The two red dots correspond to the two distinguishable protons of both DNP-Me atropisomers, no coalescence is seen and peaks stay separate and distinct from 25-105 °C.

## Crystallography Data

**Table S1.** Crystal data and structure refinement for DNP-Me

|                                             |                                                               |
|---------------------------------------------|---------------------------------------------------------------|
| Empirical formula                           | C <sub>27</sub> H <sub>22</sub> Cl <sub>2</sub> IN            |
| Formula weight                              | 558.25                                                        |
| Temperature/K                               | 296.15                                                        |
| Crystal system                              | Triclinic                                                     |
| Space group                                 | P-1                                                           |
| a/Å                                         | 7.4594(5)                                                     |
| b/Å                                         | 11.1518(7)                                                    |
| c/Å                                         | 14.7331(9)                                                    |
| α/°                                         | 94.669(4)                                                     |
| β/°                                         | 101.035(4)                                                    |
| γ/°                                         | 99.434(4)                                                     |
| Volume/Å <sup>3</sup>                       | 1178.58(13)                                                   |
| Z                                           | 2                                                             |
| ρ <sub>calc</sub> /g/cm <sup>3</sup>        | 1.573                                                         |
| μ/mm <sup>-1</sup>                          | 1.600                                                         |
| F(000)                                      | 556.0                                                         |
| Crystal size/mm <sup>3</sup>                | 0.4 × 0.38 × 0.228                                            |
| Radiation                                   | MoKα (λ = 0.71073)                                            |
| 2θ range for data collection/°              | 2.836 to 61.154                                               |
| Index ranges                                | -10 ≤ h ≤ 10, -15 ≤ k ≤ 15, -21 ≤ l ≤ 21                      |
| Reflections collected                       | 25789                                                         |
| Independent reflections                     | 7074 [R <sub>int</sub> = 0.0349, R <sub>sigma</sub> = 0.0351] |
| Data/restraints/parameters                  | 7074/0/281                                                    |
| Goodness-of-fit on F <sup>2</sup>           | 1.047                                                         |
| Final R indexes [I >= 2σ (I)]               | R <sub>1</sub> = 0.0381, wR <sub>2</sub> = 0.0973             |
| Final R indexes [all data]                  | R <sub>1</sub> = 0.0439, wR <sub>2</sub> = 0.1009             |
| Largest diff. peak/hole / e Å <sup>-3</sup> | 1.72/-1.71                                                    |
